# Supplementary material
Source: PubMed Central journal article supplement (PMC7052994)

Figure S1. DAG model for the relationship between sleep duration and diet

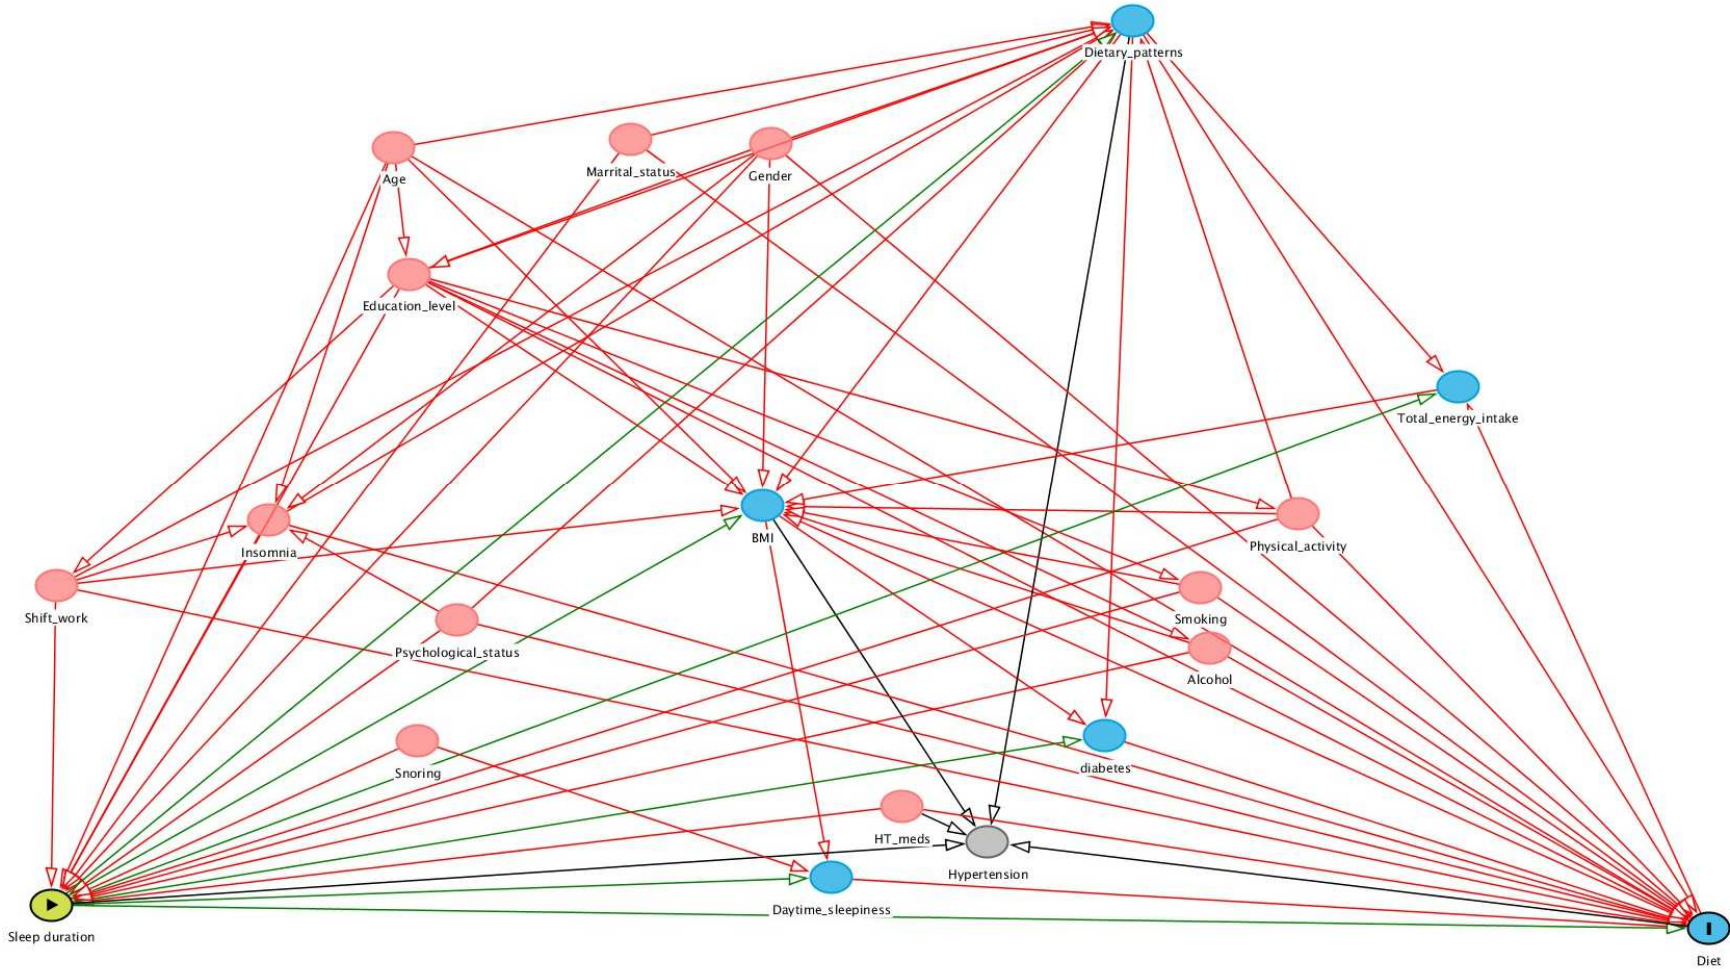

Supplement: jcsm.16.1.9.SD1.pdf [file jcsm.16.1.9.SD1.pdf]
